# Supplementary material for: Conformational dependence of the electronic coupling for singlet excitation energy transfer in DNA. An INDO/S study
Source: Royal Society of Chemistry journal article supplement (doi:10.1039/c003131c), 2010-01-01
Supplement: c003131c.pdf [file c003131c.pdf]

## Conformational dependence of the electronic coupling for singlet excitation energy transfer in DNA. An INDO/S study

Alexander A. Voityuk

*Institució Catalana de Recerca i Estudis Avançats, Barcelona 08010, Spain  
Institut de Química Computacional, Departament de Química, Universitat de Girona,  
17071 Girona, Spain.*

*E-mail: alexander.voityuk@icrea.es*

### Supporting Material

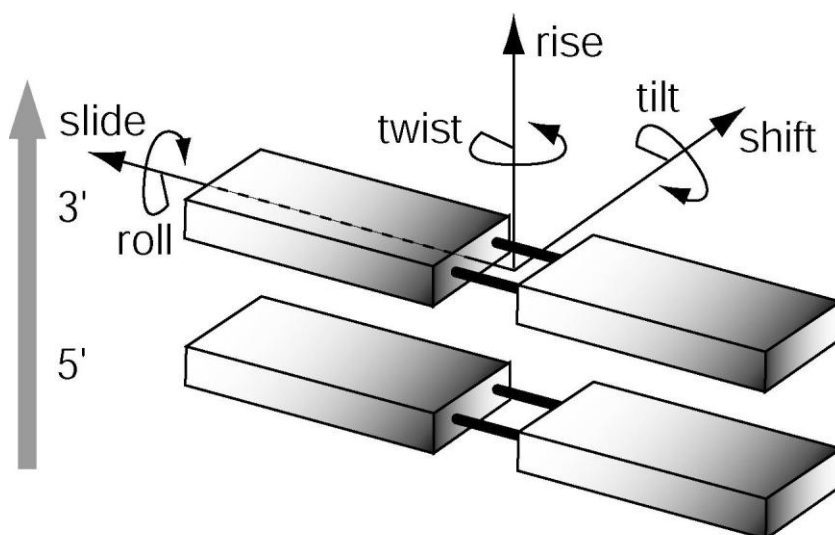

Fig. S1 Parameters that define the arrangement of adjacent basepairs in a  $\pi$  stack
